# Supplementary material for: Antibiotics Prescribing in Intensive Care Settings during the COVID-19 Era: A Systematic Review
Source: MDPI journal article supplement (doi:10.3390/antibiotics10080935), 2021-08-02
Supplement: s1 [file s1]

**Table S1.** Demographical and clinical data of 38 studies related to antibiotics perscription in the ICU settings for COVID19 patients.

| Authors, Year                           | Country | No. of ICU Patients | No. of ICU Patients Received Antibiotics | Age Median (IQR) <sup>1</sup> | Gender                 | Antibiotics Prescribed [No. (%)]                                                                                                                                 | Comorbidities [No. (%)]                                                                                                                                                                                                                | Infection Type      | Bacterial Infection in ICU Patients                                                                                                                                                                                                                                               | Death Rate [No. (%)] <sup>2</sup> | ICU Stay Length Median (IQR) Days |
|-----------------------------------------|---------|---------------------|------------------------------------------|-------------------------------|------------------------|------------------------------------------------------------------------------------------------------------------------------------------------------------------|----------------------------------------------------------------------------------------------------------------------------------------------------------------------------------------------------------------------------------------|---------------------|-----------------------------------------------------------------------------------------------------------------------------------------------------------------------------------------------------------------------------------------------------------------------------------|-----------------------------------|-----------------------------------|
| Shekerdemian, Lara S., et al., 2020 [8] | USA     | 48                  | 8                                        | 13 (4.2–16.6)                 | Male: 25               | Azithromycin: 8 (17)                                                                                                                                             | Immune suppression/malignancy: 11(23)<br>Obesity: 7 (15)<br>Diabetes: 4 (8)<br>Seizures: 3 (6)<br>Congenital heart disease: 3 (6)<br>Sickle cell disease: 2 (4)<br>Chronic lung disease: 3 (4)<br>Other congenital malformation: 2 (4) | NR <sup>1</sup>     | NR                                                                                                                                                                                                                                                                                | NR                                | 5 (3–9)                           |
| Faqihi, Fahad, et al., 2020 [9]         | KSA     | 10                  | 10                                       | 51 (45.1–55.9)                | Male: 7                | Broadspectrum antibiotics: 10 (100)                                                                                                                              | Diabetes mellitus: (60)<br>Essential hypertension: (50)<br>Cardiovascular disease: (10)                                                                                                                                                | Secondary Infection | Gram Negative                                                                                                                                                                                                                                                                     | NR                                | 15 (13.2–19.6)                    |
| Wang, Rongrong, et al., 2021 [10]       | China   | 33                  | 22                                       | NR                            | NR                     | Antibiotics: 22 (100)                                                                                                                                            | Hypertension: 16<br>Diabetes: 5<br>Cardiac disease: 3<br>Others: 4                                                                                                                                                                     | NR                  | NR                                                                                                                                                                                                                                                                                | NR                                | NR                                |
| Lima-Setta, Fernanda, et al., 2020 [11] | Brazil  | 56                  | 33                                       | 6.2 (1months–19 years)        | Male: 39<br>Female: 17 | Antibiotics: 59 (33)                                                                                                                                             | Chronic neurological disease: 5 (45.5)<br>Asthma: 1 (9.1)<br>Congenital heart defect: 2 (18.2)<br>Undernutrition: 1 (9.1)<br>Obesity: 1 (9.1)<br>Diabetes: 1 (9.1)<br>Adrenoleukodys trophy (ADL): 1 (9.1)                             | NR                  | NR                                                                                                                                                                                                                                                                                | 1 (1.8)                           | 6 (5–11)                          |
| Maataoui, Naouale, et al., 2021[12]     | France  | 191                 | 53                                       | 57 (46–65)                    | Male: 55               | Penicillins<br>Amoxicillin<br>clavulanate<br>3rd generation cephalosporin<br>4th generation cephalosporin<br>Piperacillin<br>tazobactam<br>Carbapenems<br>Others | Diabetes: 19 (28)<br>Renal failure: 14 (21)<br>Respiratory failure: 18 (27)<br>Heart failure: 23 (34)<br>Smoking: 4 (6)<br>Alcoholism: 3 (4)<br>Hypertension: 32 (48)<br>Transplants: 9 (13)<br>Cancer: 2 (3)                          | Co-infection        | Haemophilus influenza: 1<br>Pseudomonas aeruginosa: 12<br>Staphylococcus aureus: 10<br>Escherichia coli: 9<br>Klebsiella spp.: 14<br>Acinetobacter baumannii: 4<br>Others in HAP/VAP: 12<br>Stenotrophomonas maltophilia: 3<br>Morganella morganii: 1<br>Burkholderia gladioli: 1 | 38 (56)                           | NR                                |

|                                       |             |     |     |                   |                        |                                                                                                |                                                                                                                                                                                                                                                                                     |              |                                                                                                              |           |                  |
|---------------------------------------|-------------|-----|-----|-------------------|------------------------|------------------------------------------------------------------------------------------------|-------------------------------------------------------------------------------------------------------------------------------------------------------------------------------------------------------------------------------------------------------------------------------------|--------------|--------------------------------------------------------------------------------------------------------------|-----------|------------------|
| Sharifipour, Ehsan, et al., 2020 [13] | Iran        | 19  | 19  | 67 [mean] (38-92) | Male: 11<br>Female: 8  | Ceftriaxone: 19 (100)<br>Azithromycin: 19 (100)<br><b>before admission to the ICUs</b>         | Kidney disease<br>Diabetes<br>Hypertension<br>Heart disease                                                                                                                                                                                                                         | Co-infection | <i>Acinetobacter baumannii</i> : 17<br><i>Staphylococcus aureus</i> : 2<br>MRSA: 1<br>MSSA: 1                | 18 (95)   | 15               |
| Colmenero, Jordi, et al., 2021 [14]   | Spain       | 12  | 12  | 68.51 [mean]      | NR                     | azithromycin: 12 (100)                                                                         | Diabetes<br>Hypertension<br>ACE inhibitors<br>Cardiomyopathy<br>Bronchopulmonary                                                                                                                                                                                                    | NR           | NR                                                                                                           | NR        | NR               |
| Yang, Luhuan, et al., 2020 [15]       | China       | 29  | 29  | 71 [mean]         | Male: 16<br>Female: 13 | Moxifloxacin: 29 (100)<br>Ceftriaxone: 29 (100)                                                | Hypertension: 9 (31)<br>Chronic lung disease: 4 (13.8)<br>Diabetes: 4 (13.8)<br>Chronic heart disease: 1 (3.4)<br>Chronic kidney disease: 2 (6.9)<br>Malignancy: 1 (3.4)                                                                                                            | NR           | NR                                                                                                           | 15 (51.7) | NR               |
| Pereira, Marcus R., et al., 2020 [16] | USA         | 23  | 19  | 67 (56-74)        | NR                     | Azithromycin: 19 (82.6)                                                                        | NR                                                                                                                                                                                                                                                                                  | NR           | NR                                                                                                           | 16 (69.6) | NR               |
| Inama, Giuseppe, et al., 2020[17]     | Italy       | 1   | 1   | 85 years          | Female                 | Azithromycin: 1 (100)                                                                          | Hypertension: 1 (100)<br>Dyslipidemia: 1 (100)<br>Atrial fibrillation; CAD: 1 (100)<br>Coronary artery disease: 1 (100)<br>Chronic obstructive pulmonary disease: 1 (100)                                                                                                           | NR           | NR                                                                                                           | 1 (100)   | NR               |
| Wang, Junjuan, et al., 2020 [18]      | China       | 17  | 17  | NR                | NR                     | Cephalosporins (Sulperazone)<br>Quinolones<br>Carbapenems<br>Tigecycline                       | Respiratory failure septic shock<br>Cardiovascular disease<br>Cerebrovascular disease<br>Digestive system disease<br>Diabetes<br>Chronic renal insufficiency<br>Respiratory system disease<br>Nervous system disease<br>Malignant tumor<br>Rheumatism and connective tissue disease | Co-infection | <i>Acinetobacter baumannii</i> : 10<br><i>Klebsiella pneumoniae</i> : 17<br><i>Mycoplasma pneumoniae</i> : 3 | NR        | NR               |
| Piva, Simone, et al., 2020 [19]       | Italy       | 33  | 33  | 64 (59–72)        | Male: 30<br>Female: 3  | Carbapenem: 33 (100)<br>Cephalosporin: 33 (100)<br>Macrolide: 33 (100)<br>Penicillin: 33 (100) | Heart disease: 14 (43)<br>Obesity: 6 (18)<br>Lung disease: 4 (12)<br>Diabetes: 2 (6)<br>Autoimmune disease or immunodeficiency: 1 (3)                                                                                                                                               | Co-infection | <i>Extended spectrum beta-lactamase E. coli</i>                                                              | 1 (3.03)  | NR               |
| Kim, Eun Jin, et al., 2021 [20]       | South Korea | 110 | 110 | 71 (63-78)        | Male: 67<br>Female: 43 | Antibiotics: 110 (100)                                                                         | Hypertension: 55 (50)<br>Diabetes: 40 (36.4)<br>Chronic kidney disease: 11 (10)<br>Dementia: 11 (10)<br>Cerebrovascular disease: 10(9.1)<br>Malignancy: 10 (9.1)                                                                                                                    | Co-infection | <i>Pneumococcus pneumoniae</i><br><i>Mycoplasma pneumoniae</i><br><i>Pseudomonas aeruginosa</i>              | 47 (42.7) | 28.5 (15.8–42.0) |

|                                            |                                  |     |     |                                     |                                      |                                                                                                                    |                                                                                                                                                                                                                                                                                                                                                                    |              |                                                                                                                                                                                                                                           |          |                |
|--------------------------------------------|----------------------------------|-----|-----|-------------------------------------|--------------------------------------|--------------------------------------------------------------------------------------------------------------------|--------------------------------------------------------------------------------------------------------------------------------------------------------------------------------------------------------------------------------------------------------------------------------------------------------------------------------------------------------------------|--------------|-------------------------------------------------------------------------------------------------------------------------------------------------------------------------------------------------------------------------------------------|----------|----------------|
|                                            |                                  |     |     |                                     |                                      |                                                                                                                    | Cardiovascular disease: 9 (8.2)<br>Chronic lung disease: 9 (8.2)<br>Chronic liver disease: 5 (4.5)                                                                                                                                                                                                                                                                 |              |                                                                                                                                                                                                                                           |          |                |
| Hong, Kyung Soo, et al., 2020 [21]         | South Korea                      | 13  | 13  | (21–49):1<br>(50–64): 6<br>(≥65): 6 | Male: 6<br>Female: 7                 | Antibiotics: 13 (100)                                                                                              | Diabetes mellitus: 3<br>Hypertension: 5<br>Malignancy: 1<br>Parkinson’s disease: 1                                                                                                                                                                                                                                                                                 | NR           | NR                                                                                                                                                                                                                                        | 4 (30.8) | 1.2±1.5 [Mean] |
| Khamis, Faryal, et al., 2020 [22]          | Oman                             | 24  | 24  | 50 [Mean]                           | Male: 21<br>Female: 3                | Ceftriaxone: 16 (67)<br>Azithromycin: 13 (54)<br>Piperacillin/tazobactam combination: 19 (79)<br>Meropenem: 7 (29) | Hypertension: 7 (29)<br>Diabetes mellitus: 11 (46)<br>Heart disease: 2 (8.3)<br>Renal disease: 1 (4.2)                                                                                                                                                                                                                                                             | NR           | NR                                                                                                                                                                                                                                        | 5 (20.8) | 8 (5.5–13)     |
| Nachega, Jean B., et al., 2020 [23]        | Democratic Republic of the Congo | 191 | 191 | 58 (44–66)                          | Male: 135<br>Female: 55<br>1 missing | Azithromycin<br>3rd generation cephalosporin                                                                       | Hypertension: 87 (45.6)<br>hear disease: 21 (11.1)<br>Obesity: 22 (11.5)<br>Diabetes: 60 (31.6)<br>Asthma/chronic obstructive pulmonary disease: 12 (6.3)<br>Chronic kidney disease: 3 (1.6)<br>Cancer: 3 (1.6)                                                                                                                                                    | NR           | NR                                                                                                                                                                                                                                        | 86 (45)  | NR             |
| Medetalibey oğlu, Alpay, et al., 2020 [24] | Turkey                           | 11  | 11  | 70.1 [Mean]                         | Male: 8<br>Female: 3                 | Azithromycin: 11 (100)<br>Ceftriaxone: 11 (100)                                                                    | Diabetes<br>Coronary heart disease<br>Hematologic malignancy<br>Solid malignancy.<br>Chronic obstructive pulmonary disease.                                                                                                                                                                                                                                        | NR           | NR                                                                                                                                                                                                                                        | NR       | NR             |
| Ferguson, Jessica, et al., 2020 [25]       | USA                              | 21  | 14  | 57.6 (42.2–70.1)                    | Male: 13<br>Female: 8                | Azithromycin: 14 (66.7)                                                                                            | Acute respiratory distress syndrome: 13 (61.9)<br>Arrhythmia: 6 (28.6)<br>Pneumonia: 5 (23.8)<br>Acute kidney injury: 4 (19.0)<br>Catheter-related bloodstream infection: 2 (9.5)<br>Cardiomyopathy: 2 (9.5)                                                                                                                                                       | NR           | NR                                                                                                                                                                                                                                        | 3 (14.3) | 12             |
| Elabbadi, Alexandre, et al., 2021 [26]     | France                           | 101 | 58  | 61 (53–69)                          | Male: 79                             | 3rd generation cephalosporin: 58                                                                                   | Arterial hypertension: 66 (65.3)<br>Coronary heart disease: 14 (13.9)<br>Cerebrovascular disease : 7 (6.9)<br>Peripheral artery disease: 4 (4)<br>Previous venous thromboembolism: 3 (3)<br>Diabetes: 33 (32.7)<br>Chronic pulmonary disease: 7 (6.9)<br>Cancer or hematologic malignancy: 4 (4)<br>Chronic kidney disease: 21 (20.8)<br>Chronic dialysis :9 (8.9) | Co-infection | Gram-positive cocci: 12<br>Staphylococcus aureus: 11<br>MSSA: 9<br>MRSA:2<br>Streptococcus pneumoniae:1<br>Gram-negative bacilli: 13<br>E. coli: 2<br>Klebsiella spp: 2<br>Enterobacter, Citrobacter, Hafnia spp: 4<br>Pseudomonas spp: 2 | 21 (21)  | 14 (6–26)      |

|                                                 |        |     |     |              |                        |                                                                                                                                                                         |                                                                                                                                                                                                                                                          |              |                                                                                                                                                                                                                                                                                             |            |                                                                              |
|-------------------------------------------------|--------|-----|-----|--------------|------------------------|-------------------------------------------------------------------------------------------------------------------------------------------------------------------------|----------------------------------------------------------------------------------------------------------------------------------------------------------------------------------------------------------------------------------------------------------|--------------|---------------------------------------------------------------------------------------------------------------------------------------------------------------------------------------------------------------------------------------------------------------------------------------------|------------|------------------------------------------------------------------------------|
| Contou, Damien, et al., 2020 [27]               | France | 92  | 39  | 61 (55-70)   | Male: 73               | Cefotaxime: 14 (36)<br>Amoxicillin/clavulanate combination: 13 (33)<br>Amoxicillin: 6 (15)<br>Piperacillin/tazobactam<br>Combination: 1(3)<br>Others antibiotic: 5 (13) | Obesity: 38<br>Hypertension: 59<br>Diabetes mellitus: 35<br>Cardiovascular diseases: 9<br>Atrial fibrillation: 3<br>Cerebrovascular diseases: 8<br>Chronic respiratory diseases: 18<br>Chronic renal failure: 7<br>Immunocompromised:9                   | Co-infection | <i>Staphylococcus aureus</i> : 10 (31)<br><i>Haemophilus influenza</i> : 7 (22)<br><i>Streptococcus pneumonia</i> : 6 (19)<br><i>Enterobacteriaceae</i> : 5 (16)<br><i>Pseudomonas aeruginosa</i> : 2 (6)<br><i>Moraxella catarrhalis</i> : 1 (3)<br><i>Acinetobacter baumannii</i> : 1 (3) | 45 (49)    | 1 (0–4)                                                                      |
| Dubernet, Arthur, et al., 2020 [28]             | France | 10  | 1   | 71 (59–74)   | Male: 10               | 3 <sup>rd</sup> generation cephalosporin: 1<br>Azithromycin: 1                                                                                                          | Hypertension: 6<br>Diabetes mellitus: 3<br>Obesity: 2<br>Heart disease: 2<br>Respiratory disease: 2<br>Kidney disease: 3                                                                                                                                 | NR           | NR                                                                                                                                                                                                                                                                                          | 0          | 25 (15–35) patients treated with HCQ/AZT and 40 (25–55) treated with HCQ/AZT |
| Kolenda, Camille, et al., 2020 [29]             | France | 99  | 72  | NR           | NR                     | Amoxicillin and clavulanic acid: 72<br>3 <sup>rd</sup> generation cephalosporins: 72                                                                                    | Acute respiratory syndrome                                                                                                                                                                                                                               | Co-infection | <i>Staphylococcus aureus</i> : 7<br><i>Haemophilus influenza</i> : 4<br><i>Streptococcus pneumonia</i> : 2<br><i>Enterobacteriaceae</i> : 2<br><i>Moraxella catarrhalis</i> : 1<br><i>Legionella pneumophila</i> : 1                                                                        | NR         | NR                                                                           |
| Movahed, Seyed Majid Mousavi, et al., 2021 [30] | Iran   | 183 | 120 | NR           | NR                     | NR                                                                                                                                                                      | NR                                                                                                                                                                                                                                                       | NR           | NR                                                                                                                                                                                                                                                                                          | 79 (43.2)  | NR                                                                           |
| Zuccon, William, et al., 2020 [31]              | Italy  | 54  | 54  | (30-89)      | Male: 44<br>Female: 10 | NR                                                                                                                                                                      | Renal failure: 16<br>Peritoneal dialysis: 10<br>Liver failure: 7<br>Lesions due to ventilation: 6<br>Heart disease: 3<br>Central neurological: 5<br>Meningo-encephalitis: 2<br>Cerebral haemorrhage: 1<br>peripheral neurological event: 2<br>Paresis: 3 | NR           | NR                                                                                                                                                                                                                                                                                          | 21 (38.9)  | 28 [Average] (1 – 56)                                                        |
| Zhang, Lin, et al., 2020 [32]                   | China  | 134 | 131 | 60.78 [Mean] | Male: 87<br>Female: 47 | Fluoroquinolones: 131 (97.76)<br>Carbapenems:131 (97.76)                                                                                                                | Acute Respiratory Distress Syndrome: 105 (78.36)<br>Acute cardiac injury: 75 (55.97)<br>Pneumothorax: 3 (2.24)<br>Liver dysfunction: 53 (39.55)<br>Acute kidney injury: 63 (47.01)                                                                       | NR           | NR                                                                                                                                                                                                                                                                                          | 101 (75.4) | 10 (8–13)                                                                    |

|                                            |        |     |     |                  |          |                                                                                                                                                                                                                                                                                                                                                               |                                                                                                        |              |                                                                                                                                                                                                                                                                                                   |            |             |
|--------------------------------------------|--------|-----|-----|------------------|----------|---------------------------------------------------------------------------------------------------------------------------------------------------------------------------------------------------------------------------------------------------------------------------------------------------------------------------------------------------------------|--------------------------------------------------------------------------------------------------------|--------------|---------------------------------------------------------------------------------------------------------------------------------------------------------------------------------------------------------------------------------------------------------------------------------------------------|------------|-------------|
| Jamous, Fady, et al., 2020 [33]            | USA    | 37  | 37  | NR               | NR       | NR                                                                                                                                                                                                                                                                                                                                                            | Diabetes: (43)<br>Hypertension: (47)                                                                   | NR           | NR                                                                                                                                                                                                                                                                                                | NR         | 11          |
| Al-Matary, Abdulrahman, et al., 2021 [34]  | KSA    | 86  | 62  | Neonate          | NR       | NR                                                                                                                                                                                                                                                                                                                                                            | NR                                                                                                     | NR           | NR                                                                                                                                                                                                                                                                                                | 0          | 8 (13–7)    |
| Arshad, Samia, et al., 2020 [35]           | USA    | 614 | 309 | NR               | NR       | Azithromycin                                                                                                                                                                                                                                                                                                                                                  | NR                                                                                                     | NR           | NR                                                                                                                                                                                                                                                                                                | 460 (74.9) | (2.3 - 5.3) |
| Alfraij, Abdulla, et al., 2021 [36]        | KSA    | 25  | 25  | 2.78 (0.21-8.51) | Male: 15 | Penicillins: 4 (16)<br>Third-generation cephalosporins: 14 (56)<br>Macrolides: 4 (16)<br>Lincosamides: 3 (12)<br>Beta lactam-beta lactamase inhibitor (anti-pseudomonal): 11 (44)<br>Glycopeptides: 11 (44)<br>Carbapenems: 5 (20)<br>Aminoglycosides: 2 (8)<br>Trimethoprim-sulfonamide combinations: 2 (8)<br>Fluroquinolones: 1 (4)<br>Imidazoles: 1 (4.2) | Neurological disease: 6 (24)<br>Hematological malignancies: 5 (20)<br>Congenital heart disease: 4 (16) | NR           | NR                                                                                                                                                                                                                                                                                                | 4 (16)     | 5 (3.75–21) |
| Lagier, Jean-Christophe, et al., 2020 [37] | France | 67  | 64  | NR               | NR       | Azithromycin                                                                                                                                                                                                                                                                                                                                                  | NR                                                                                                     | Co-infection | <i>Streptococcus pneumoniae</i><br><i>Staphylococcus aureus</i><br><i>Morganella morganii</i> ,<br><i>Enterobacter cloacae</i><br><i>Stenotrophomonas maltophilia</i> ,<br><i>Enterobacter cloacae</i><br><i>Klebsiella pneumoniae</i><br><i>Staphylococcus aureus</i><br><i>Escherichia coli</i> | 35(52.2)   | NR          |

|                                          |          |     |     |                        |                        |                                                                   |                                                                                                                                                                                                                                                                                                                                                                                                                                                                                                                                                                                                                                                                   |              |                                                                                                                             |          |                     |
|------------------------------------------|----------|-----|-----|------------------------|------------------------|-------------------------------------------------------------------|-------------------------------------------------------------------------------------------------------------------------------------------------------------------------------------------------------------------------------------------------------------------------------------------------------------------------------------------------------------------------------------------------------------------------------------------------------------------------------------------------------------------------------------------------------------------------------------------------------------------------------------------------------------------|--------------|-----------------------------------------------------------------------------------------------------------------------------|----------|---------------------|
| Bowes, Elaine, et al., 2021 [38]         | UK       | 44  | 44  | 60 (55-64)             | Male: 35               | Vancomycin<br>Broad-spectrum antibiotics                          | Diabetes: 20 (45.5)<br>Hypertension: 30 (68.2)<br>Cardiovascular disease: 10 (22.7)                                                                                                                                                                                                                                                                                                                                                                                                                                                                                                                                                                               | NR           | NR                                                                                                                          | NR       | 13.5 (10.0–20.3)    |
| Lei, Shaoqing, et al., 2020 [39]         | China    | 15  | 15  | 55 (44-74)             | Male: 5                | Antibiotics                                                       | Any comorbidity: 12 (80)<br>Hypertension: 9 (60)<br>Malignancy: 5 (33.3)<br>Diabetes: 6 (40)<br>Cardiovascular disease: 6 (40)<br>Cerebrovascular disease: 2 (13.3)<br>COPD: 1 (6.7) Chronic kidney disease: 1 (6.7)                                                                                                                                                                                                                                                                                                                                                                                                                                              | NR           | NR                                                                                                                          | 7 (46.7) | NR                  |
| Abenza-Abildúa, M. J., et al., 2020 [40] | Spain    | 30  | 30  | 57.41                  | Male: 21               | Ceftriaxone<br>Empirical Antibiotic                               | Arterial hypertension: 8 (26.66)<br>Obesity: 8 (26.66)<br>Diabetes mellitus: 6 (20)                                                                                                                                                                                                                                                                                                                                                                                                                                                                                                                                                                               | NR           | NR                                                                                                                          | 3 (10 )  | 18.83 [Mean] (6-55) |
| García-Posada, Mara, et al., 2021 [41]   | Colombia | 100 | 70  | NR                     | NR                     | Cefepime<br>Piperacillin<br>Tazobactam<br>Meropenem<br>Vancomycin | NR                                                                                                                                                                                                                                                                                                                                                                                                                                                                                                                                                                                                                                                                | Co-infection | <i>Klebsiella pneumonia</i><br><i>Pseudomonas aeruginosa</i><br><i>Staphylococcus aureus</i><br><i>Enterobacter cloacae</i> | NR       | NR                  |
| McCarthy et al., 2020 [42]               | USA      | 112 | 110 | 63.5 (52.5-77.3)       | Male: 71<br>Female: 41 | Azithromycin<br>Other antibiotics                                 | Obese: 47 (42)<br>Asthma: 11 (9.8)<br>COPD: 10 (8.9)<br>Interstitial lung disease: 1 (0.9)<br>OSA/OHS: 14 (12.5)<br>Hypertension: 63 (56.2)<br>Hyperlipidemia: 55 (49.1)<br>Diabetes Mellitus: 36 (32.1)<br>Known CAD: 16 (14.3)<br>Prior MI: 6 (5.4)<br>Prior revascularization: 10 (8.9)<br>Heart Failure: 12 (10.7)<br>PAD: 2 (1.8)<br>Prior stroke/TIA: 3 (2.7)<br>Atrial fibrillation: 16 (14.3)<br>Liver cirrhosis: 2 (1.8)<br>CKD: 11 (9.8)<br>CKD on dialysis: 5 (4.5)<br>History of malignancy: 22 (19.6)<br>Active malignancy: 11 (8.9)<br>Prior organ transplant: 4 (3.6)<br>Rheumatologic or inflammatory disorder requiring immunosuppression: 9 (8) | NR           | NR                                                                                                                          | 3 (2.68) | 15 (5-24.5)         |
| Zuo, Tao, et al., 2020 [43]              | China    | 2   | 1   | Male: 42<br>Female: 65 | Male: 1<br>Female: 1   | Daptomycin<br>Meropenem                                           | Female : Hypothyroidism<br>Hypertension<br>Chronic hepatitis B carrier                                                                                                                                                                                                                                                                                                                                                                                                                                                                                                                                                                                            | NR           | NR                                                                                                                          | 0        | NR                  |

|                                         |           |    |    |            |          |                                      |                                       |              |      |           |            |
|-----------------------------------------|-----------|----|----|------------|----------|--------------------------------------|---------------------------------------|--------------|------|-----------|------------|
| Mustafa,<br>Lirim, et al.,<br>2021 [44] | Kosovo    | 52 | 52 | 61 (20-86) | Male: 35 | Mipenem: 30 (58)                     | Obesity: 23 (44)                      | Co-infection | MRSA | 29 (55.7) | NR         |
|                                         |           |    |    |            |          | Ceftriaxone: 28 (54)                 | Hypertension: 9 (17)                  |              |      |           |            |
| Dewi,<br>Rismala, et<br>al., 2021 [45]  | Indonesia | 16 | 16 | NR         | NR       | Fluoroquinolones:<br>22 (42)         | Diabetes mellitus: 21 (40)            | NR           | NR   | 16 (100)  | 1.5 (0-11) |
|                                         |           |    |    |            |          | Piperacillin/tazobact<br>am: 17 (33) | Cardio-vascular diseases: 8 (15)      |              |      |           |            |
|                                         |           |    |    |            |          | Ceftazidime: 3 (6)                   | Atrial fibrillation: 10 (19)          |              |      |           |            |
|                                         |           |    |    |            |          | Meropenem: 1 (2)                     | Cerebrovascular diseases: 8 (15)      |              |      |           |            |
|                                         |           |    |    |            |          | Antibiotics<br>(not spacificed)      | Chronic respiratory diseases: 17 (33) |              |      |           |            |
|                                         |           |    |    |            |          |                                      | Chronic renal failure: 14 (27)        |              |      |           |            |
|                                         |           |    |    |            |          |                                      | Cerebrovascular diseases: 8 (15)      |              |      |           |            |
|                                         |           |    |    |            |          |                                      |                                       |              |      |           |            |

<sup>1</sup> Abbreviation: IQR: Interquartile Range, NR: Not Reported, <sup>2</sup> Death Rate = (No. of deaths from ICU patients/Total No. of ICU patients) \* 100.
